# Supplementary material
Source: MDPI journal article supplement (https://www.mdpi.com/2306-5710/8/1/13)
Supplement: s1 [file s1]

# **Effect of extraction methodology on the phytochemical composition for *Camelia sinensis* instant teas from different provenances.**

Sérgio Barreira<sup>1</sup>, André M. N. Silva<sup>2</sup>, Carla Moutinho<sup>1</sup>, Ean-Jeong Seo<sup>3</sup>, Mohamed-Elamir F. Hegazy<sup>3</sup>, Thomas Efferth<sup>3</sup> and Lígia Rebelo Gomes<sup>1,2,\*</sup>

Supplementary Information

**Table S1.** Content of catechins in green teas in mg/g of extract of the samples, determined by HPLC (mg/g extract); **C** – China tea; **A** – Azores tea; **J** – Japan tea; **SL** – Sri Lanka Tea; **1**- Infusion; **2** – Maceration; **3** – Methanolic extract.; TCC – total catechins; TPC – Total phenolic content.

| Sample     | EGCG                      | EC                          | EGC                         | ECG                       | C                      | TP     | TCC    | $\% \left( \frac{TCC}{TCP} \right)$ | GA                      | NCA                      | <i>o</i> -CQA            | Q-3-gal                | K                      |
|------------|---------------------------|-----------------------------|-----------------------------|---------------------------|------------------------|--------|--------|-------------------------------------|-------------------------|--------------------------|--------------------------|------------------------|------------------------|
| <b>C1</b>  | 105.65±10.21 <sup>b</sup> | 32.65±0.10 <sup>b,c,d</sup> | 11.05±2.57 <sup>d</sup>     | 24.42±2.16 <sup>b</sup>   | 0.95±0.22 <sup>b</sup> | 183.69 | 174.72 | 95.12                               | 2.39±0.04 <sup>d</sup>  | 3.34±0.07 <sup>b,c</sup> | 2.24±0.11 <sup>c</sup>   | 1.07±0.11 <sup>b</sup> | 0.93±0.10 <sup>c</sup> |
| <b>C2</b>  | 35.93±3.19 <sup>b</sup>   | 37.37±3.39 <sup>a,b,c</sup> | 24.18±4.20 <sup>b</sup>     | 11.60±1.03 <sup>b,c</sup> | 1.28±0.05 <sup>b</sup> | 138.80 | 110.36 | 79.51                               | 20.47±1.60 <sup>c</sup> | 2.58±0.16 <sup>b,c</sup> | 2.72±0.18 <sup>b,c</sup> | 1.23±0.02 <sup>b</sup> | 1.44±0.14 <sup>b</sup> |
| <b>C3</b>  | 102.53±29.88 <sup>b</sup> | 6.58±0.18 <sup>d</sup>      | 16.81±2.87 <sup>b,c,d</sup> | 52.62±9.04 <sup>a</sup>   | <LOD                   | 187.69 | 178.54 | 95.13                               | 2.27±0.24 <sup>d</sup>  | 2.87±0.30 <sup>b,c</sup> | 3.78±0.52 <sup>b,c</sup> | 1.04±0.20 <sup>b</sup> | 0.20±0.03 <sup>d</sup> |
| <b>J1</b>  | 109.13±0.82 <sup>b</sup>  | 61.01±1.38 <sup>a,b</sup>   | 23.43±0.55 <sup>b,c</sup>   | 22.96±1.21 <sup>b</sup>   | 1.20±0.01 <sup>b</sup> | 259.88 | 217.74 | 83.78                               | 33.85±0.10 <sup>b</sup> | 3.13±0.10 <sup>b</sup>   | 2.47±0.11 <sup>c</sup>   | 1.19±0.07 <sup>b</sup> | 1.50±0.04 <sup>b</sup> |
| <b>J2</b>  | 98.80±4.47 <sup>b</sup>   | 44.66±2.80 <sup>a,b,c</sup> | 16.91±0.54 <sup>b,c,d</sup> | 17.90±0.87 <sup>b,c</sup> | 1.32±0.17 <sup>b</sup> | 191.28 | 179.58 | 93.88                               | 4.24±0.15 <sup>d</sup>  | 2.05±0.09 <sup>b,c</sup> | 4.18±0.14 <sup>b,c</sup> | 1.05±0.04 <sup>b</sup> | 0.18±0.01 <sup>d</sup> |
| <b>J3</b>  | 139.28±8.83 <sup>b</sup>  | 21.91±3.67 <sup>c,d</sup>   | 15.12±1.37 <sup>c,d</sup>   | 60.40±1.88 <sup>a</sup>   | <LOD                   | 246.72 | 236.71 | 95.94                               | 2.11±0.06 <sup>d</sup>  | 1.48±0.07 <sup>c</sup>   | 4.67±0.04 <sup>b</sup>   | 1.32±0.20 <sup>b</sup> | 0.42±0.02 <sup>d</sup> |
| <b>SL1</b> | 341.01±11.54 <sup>a</sup> | 70.81±28.71 <sup>a</sup>    | 35.00±1.72 <sup>a</sup>     | 58.65±12.30 <sup>a</sup>  | 3.15±0.57 <sup>a</sup> | 530.67 | 508.62 | 95.84                               | 1.99±0.31 <sup>d</sup>  | 5.63±1.62 <sup>a</sup>   | 10.62±0.88 <sup>a</sup>  | 3.38±0.78 <sup>a</sup> | 0.43±0.09 <sup>d</sup> |
| <b>SL2</b> | <LOD                      | 64.16±1.58 <sup>a,b</sup>   | 24.79±5.57 <sup>b</sup>     | 0.72±0.06 <sup>c</sup>    | 0.97±0.63 <sup>b</sup> | 195.81 | 90.64  | 46.29                               | 99.02±6.68 <sup>a</sup> | 1.37±0.05 <sup>c</sup>   | 2.45±0.10 <sup>c</sup>   | 0.90±0.08 <sup>b</sup> | 1.42±0.08 <sup>b</sup> |
| <b>SL3</b> | 123.25±7.90 <sup>b</sup>  | 25.46±3.71 <sup>c,d</sup>   | 17.38±0.69 <sup>b,c,d</sup> | 70.88±4.89 <sup>a</sup>   | <LOD                   | 247.54 | 236.97 | 95.73                               | 2.96±0.15 <sup>d</sup>  | 1.68±0.08 <sup>c</sup>   | 2.59±0.22 <sup>b,c</sup> | 0.92±0.05 <sup>b</sup> | 2.42±0.06 <sup>a</sup> |

Values expressed as mean ± standard deviation obtained from three measurements per replicate. TP (total phenolics) = EGCG+EC+EGC+ECG+C+GA+ NCA+ *o*-CQA+ Q-3-gal+K. TCC (total catechin content) = EGCG+EC+EGC+ECG+C. For each compound, different lowercase superscripts indicate statistical significant differences ( $p < 0.05$ ).

**Table S2** Content of L-theanine, caffeine and theophylline in green teas expressed in mg/g of extract. **C**–China tea; **A**–Azores tea; **J**–Japan tea; **SL**–Sri Lanka Tea; **1**- Infusion; **2** – Maceration; **3** – methanolic extract.

| Sample     | L-Theanine                    | Caffeine                      | Theophylline               |
|------------|-------------------------------|-------------------------------|----------------------------|
| <b>C1</b>  | 304.70 ± 22.28 <sup>a</sup>   | 43.22 ± 3.34 <sup>c,d</sup>   | 0.039 ± 0.001 <sup>b</sup> |
| <b>C2</b>  | 137.51 ± 24.25 <sup>c,d</sup> | 32.20 ± 3.05 <sup>d</sup>     | 0.014 ± 0.004 <sup>b</sup> |
| <b>C3</b>  | <LOD                          | 49.35 ± 6.16 <sup>c,d</sup>   | 0.046 ± 0.008 <sup>b</sup> |
| <b>J1</b>  | 121 ± 25.32 <sup>b,c,d</sup>  | 64.38 ± 2.53 <sup>b,c,d</sup> | 0.032 ± 0.002 <sup>b</sup> |
| <b>J2</b>  | 199.49 ± 20.60 <sup>b</sup>   | 48.79 ± 2.34 <sup>c,d</sup>   | 0.041 ± 0.006 <sup>b</sup> |
| <b>J3</b>  | <LOD                          | 90.91 ± 5.76 <sup>b</sup>     | 0.080 ± 0.002 <sup>b</sup> |
| <b>SL1</b> | 174.91 ± 11.70 <sup>d</sup>   | 141.0 ± 26.4 <sup>a</sup>     | 0.339 ± 0.069 <sup>a</sup> |
| <b>SL2</b> | 242.81 ± 24.13 <sup>b,c</sup> | 61.74 ± 4.50 <sup>b,c,d</sup> | 0.007 ± 0.001 <sup>b</sup> |
| <b>SL3</b> | <LOD                          | 75.67 ± 0.62 <sup>b,c</sup>   | 0.019 ± 0.001 <sup>b</sup> |

Values expressed as mean ± standard deviation obtained from 3 measurements per replicate. For each parameter, different lowercase superscripts indicate statistically significant differences ( $p < 0$ ).
